# Supplementary material
Source: HighWire-hosted journal article supplement (https://bmjopen.bmj.com/content/7/6/e014722)
Supplement: inline-supplementary-material-1 [file inline-supplementary-material-1.pdf]

## Appendix 1:

### MEDLINE search strategy (search completed on October 19, 2015)

---

1. (cost adj analysis).ti,ab.
  2. exp Economics, Medical/ or exp Economics, Hospital/
  3. (economic\* or price or pricing).ti,ab.
  4. (expenditure\* not energy).ti,ab.
  5. value for money.ti,ab.
  6. budget\*.ti,ab.
  7. return on investment.ti,ab.
  8. value proposition.ti,ab.
  9. exp Markov Chains/
  10. 1 or 2 or 3 or 4 or 5 or 6 or 7 or 8 or 9
  11. letter.pt.
  12. editorial.pt.
  13. 11 or 12
  14. 10 not 13
  15. exp Patient Discharge/
  16. exp Patient Discharge Summaries/
  17. (discharge or referral or transition or handoff).ti,ab.
  18. (patient adj summar\*).ti.
  19. 15 or 16 or 17 or 18
  20. web based.ti,ab.
  21. exp Electronics/
  22. exp Medical Records Systems, Computerized/
  23. (electronic\* or computer\*).ti,ab.
  24. 20 or 21 or 22 or 23
  25. 14 and 19 and 24
- 

### EMBASE search strategy (search completed on October 19, 2015)

---

1. (cost adj analysis).ti,ab.
  2. health economics/
  3. (economic\* or price or pricing).ti,ab.
  4. (expenditure\* not energy).ti,ab.
  5. value for money.ti,ab.
  6. budget\*.ti,ab.
  7. return on investment.ti,ab.
  8. value proposition.ti,ab.
  9. markov chains.ti,ab.
  10. 1 or 2 or 3 or 4 or 5 or 6 or 7 or 8 or 9
  11. letter.pt.
  12. editorial.pt.
  13. 11 or 12
  14. 10 not 13
-

- 
15. hospital discharge/
  16. (discharge or referral or transition or handoff).ti,ab.
  17. (patient adj summar\*).ti.
  18. 15 or 16 or 17
  19. web based.ti,ab.
  20. electronics/
  21. (electronic\* or computer\*).ti,ab.
  22. 19 or 20 or 21
  23. 14 and 18 and 22
- 

EconLit search strategy (search completed on October 19, 2015)

---

1. TI patient discharge or TI hospital discharge or TI patient referral or TI patient transition or TI patient handoff
- 

NHSEED search strategy (search completed on October 19, 2015)

---

1. Patient Discharge/
  2. (discharge or referral or transition or handoff).ti.
  3. 1 or 2
- 

Web of Science search strategy (search completed on October 19, 2015)

---

1. TS=(cost near/1 analysis)  
Indexes=SCI-EXPANDED, SSCI, A&HCI, CPCI-S, CPCI-SSH Timespan=All years
  2. TS=(economic\* or price or pricing)  
Indexes=SCI-EXPANDED, SSCI, A&HCI, CPCI-S, CPCI-SSH Timespan=All years
  3. TS=(expenditure\* NOT energy)  
Indexes=SCI-EXPANDED, SSCI, A&HCI, CPCI-S, CPCI-SSH Timespan=All years
  4. TS=(value near/3 money)  
Indexes=SCI-EXPANDED, SSCI, A&HCI, CPCI-S, CPCI-SSH Timespan=All years
  5. TS=(budget\*)  
Indexes=SCI-EXPANDED, SSCI, A&HCI, CPCI-S, CPCI-SSH Timespan=All years
  6. TS=(return near/2 investment)  
Indexes=SCI-EXPANDED, SSCI, A&HCI, CPCI-S, CPCI-SSH Timespan=All years
  7. TS=(value near/1 proposition)  
Indexes=SCI-EXPANDED, SSCI, A&HCI, CPCI-S, CPCI-SSH Timespan=All years
  8. TS=(Markov near/1 chains)  
Indexes=SCI-EXPANDED, SSCI, A&HCI, CPCI-S, CPCI-SSH Timespan=All years
-

- 
- years
9. #8 OR #7 OR #6 OR #5 OR #4 OR #3 OR #2 OR #1  
Indexes=SCI-EXPANDED, SSCI, A&HCI, CPCI-S, CPCI-SSH Timespan=All  
years
10. #8 OR #7 OR #6 OR #5 OR #4 OR #3 OR #2 OR #1  
**Refined by:** [excluding] **DOCUMENT TYPES:** ( BOOK CHAPTER OR  
BIBLIOGRAPHY OR MUSIC PERFORMANCE REVIEW OR DISCUSSION  
OR SOFTWARE REVIEW OR EXCERPT OR BOOK REVIEW OR  
CORRECTION OR ART EXHIBIT REVIEW OR TV REVIEW RADIO  
REVIEW OR REVIEW OR REPRINT OR ABSTRACT OF PUBLISHED  
ITEM OR DATABASE REVIEW OR EDITORIAL MATERIAL OR  
BIOGRAPHICAL ITEM OR HARDWARE REVIEW OR TV REVIEW  
RADIO REVIEW VIDEO OR RECORD REVIEW OR FILM REVIEW OR  
MUSIC SCORE REVIEW OR LETTER OR ITEM ABOUT AN INDIVIDUAL  
OR FICTION CREATIVE PROSE OR SCRIPT OR NOTE OR CORRECTION  
ADDITION OR CHRONOLOGY OR DANCE PERFORMANCE REVIEW  
OR NEWS ITEM OR POETRY OR THEATER REVIEW )  
Indexes=SCI-EXPANDED, SSCI, A&HCI, CPCI-S, CPCI-SSH Timespan=All  
years
11. TI=(patient near/5 discharge)  
Indexes=SCI-EXPANDED, SSCI, A&HCI, CPCI-S, CPCI-SSH Timespan=All  
years
12. TI=(discharge or referral or transition or handoff)  
Indexes=SCI-EXPANDED, SSCI, A&HCI, CPCI-S, CPCI-SSH Timespan=All  
years
13. TI=(patient near/1 summar\*)  
Indexes=SCI-EXPANDED, SSCI, A&HCI, CPCI-S, CPCI-SSH Timespan=All  
years
14. #12 OR #11  
Indexes=SCI-EXPANDED, SSCI, A&HCI, CPCI-S, CPCI-SSH Timespan=All  
years
15. TI=(web near/1 based)  
Indexes=SCI-EXPANDED, SSCI, A&HCI, CPCI-S, CPCI-SSH Timespan=All  
years
16. TI=(electronic\* or computer\*)  
Indexes=SCI-EXPANDED, SSCI, A&HCI, CPCI-S, CPCI-SSH Timespan=All  
years
17. #15 OR #14  
Indexes=SCI-EXPANDED, SSCI, A&HCI, CPCI-S, CPCI-SSH Timespan=All  
years
18. #16 AND #13 AND #10  
Indexes=SCI-EXPANDED, SSCI, A&HCI, CPCI-S, CPCI-SSH Timespan=All  
years
-

- 
1. ((cost adj analysis[Title/Abstract]) OR (economic\*[Title/Abstract]) OR price[Title/Abstract] OR pricing[Title/Abstract] OR (expenditure\* not energy[Title/Abstract]) OR (value for money[Title/Abstract]) OR (budget\*[Title/Abstract]) OR (return on investment[Title/Abstract]) OR (value proposition[Title/Abstract]) OR (markov chains[Title/Abstract])) AND((discharge[Title/Abstract] OR referral[Title/Abstract] OR transition[Title/Abstract] OR handoff[Title/Abstract]) OR (patient adj summar\*[Title/Abstract])) AND ((web based[Title/Abstract]) OR (electronic\*[Title/Abstract] OR computer\*[Title/Abstract]))
-

## Appendix 2:

### CHEC-list of included studies (6)

|     |                                                                                                           | Kopach, R., <i>et al</i> (10) | Colsman, A., <i>et al</i> (11) | Aanesen, M., <i>et al</i> (12) | Mourad, M., <i>et al</i> (13) |
|-----|-----------------------------------------------------------------------------------------------------------|-------------------------------|--------------------------------|--------------------------------|-------------------------------|
| 1.  | Is the study population clearly described?                                                                | X                             | X                              | X                              | X                             |
| 2.  | Are competing alternatives clearly described?                                                             | X                             | X                              | X                              | X                             |
| 3.  | Is a well-defined research question posed in answerable form?                                             | X                             | X                              | X                              | X                             |
| 4.  | Is the economic study design appropriate to the stated objective?                                         | X                             |                                |                                |                               |
| 5.  | Is the chosen time horizon appropriate in order to include relevant costs and consequences?               | X                             |                                | X                              |                               |
| 6.  | Is the actual perspective chosen appropriate?                                                             | X                             |                                |                                |                               |
| 7.  | Are all important and relevant costs for each alternative identified?                                     | X                             | X                              | X                              | X                             |
| 8.  | Are all costs measured appropriately in physical units?                                                   | X                             | X                              | X                              |                               |
| 9.  | Are all costs valued appropriately?                                                                       | X                             |                                | X                              |                               |
| 10. | Are all important and relevant outcomes for each alternative identified?                                  | X                             | X                              | X                              | X                             |
| 11. | Are all outcomes measured appropriately?                                                                  | X                             | X                              | X                              |                               |
| 12. | Are outcomes valued appropriately?                                                                        | X                             | X                              | X                              |                               |
| 13. | Is an incremental analysis of costs and outcomes of alternatives performed?                               | X                             |                                |                                |                               |
| 14. | Are all future costs and outcomes discounted appropriately?                                               | X                             |                                | X                              |                               |
| 15. | Are all important variables, whose values are uncertain, appropriately subjected to sensitivity analysis? | X                             |                                |                                |                               |
| 16. | Do the conclusions follow from the data reported?                                                         | X                             | X                              | X                              | X                             |
| 17. | Does the study discuss the generalizability of the results to other settings and patient/client groups?   | X                             |                                |                                | X                             |
| 18. | Does the article indicate that there is no potential conflict of                                          | X                             | X                              |                                |                               |

|     |                                                                |  |  |  |  |
|-----|----------------------------------------------------------------|--|--|--|--|
|     | interest of study researcher(s) and funder(s)?                 |  |  |  |  |
| 19. | Are ethical and distributional issues discussed appropriately? |  |  |  |  |
